# Supplementary material for: Severe Inflammatory Colitis Related to Encorafenib and Binimetinib following Immune Checkpoint Inhibitor Therapy
Source: PubMed Central journal article supplement — Case Rep Gastroenterol. 2022 Jun 13;16(2):388–93. doi: 10.1159/000525012 (PMC9247533; doi:10.1159/000525012), 2022-06-13
Supplement: crg-0016-0388-s01.pdf [file crg-0016-0388-s01.pdf]

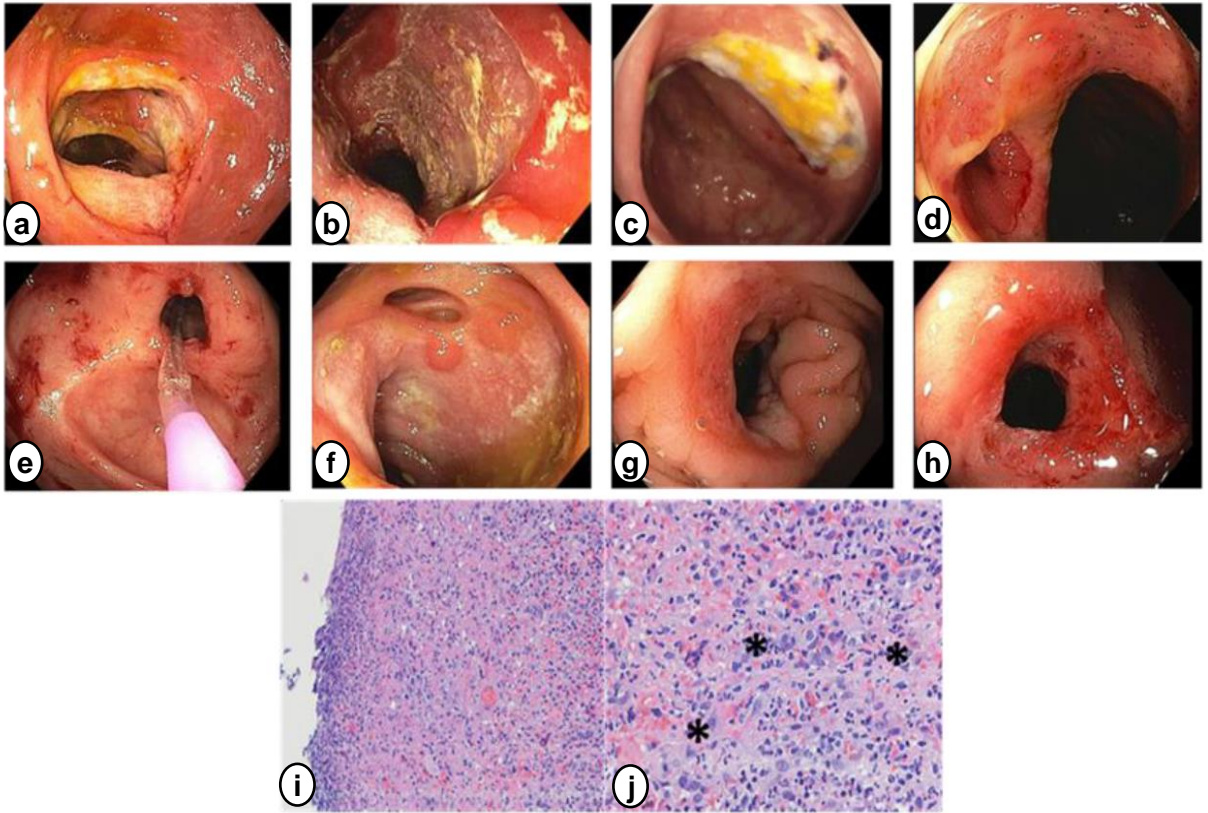

Supplemental Figure 1a. Endoscopic images before and after GIAE treatment (a) Patient A before (b) Patient B before (c) Patient C before (d) Patient D before (e) Patient A after (f) Patient B after (g) Patient C after (h) Patient D after (i) Pathology: mucosal ulcers (left, H&E, 10X) (j) acute inflammation with neutrophil infiltration (right, H&E, 20X).
