# Supplementary material for: Severe Inflammatory Colitis Related to Encorafenib and Binimetinib following Immune Checkpoint Inhibitor Therapy
Source: PubMed Central journal article supplement — Case Rep Gastroenterol. 2022 Jun 13;16(2):388–93. doi: 10.1159/000525012 (PMC9247533; doi:10.1159/000525012), 2022-06-13

Supplemental Figure 1b. Timeline of medical treatments for colitis and cancer in (a) Patient A (b) Patient B (c) Patient C (d) Patient D

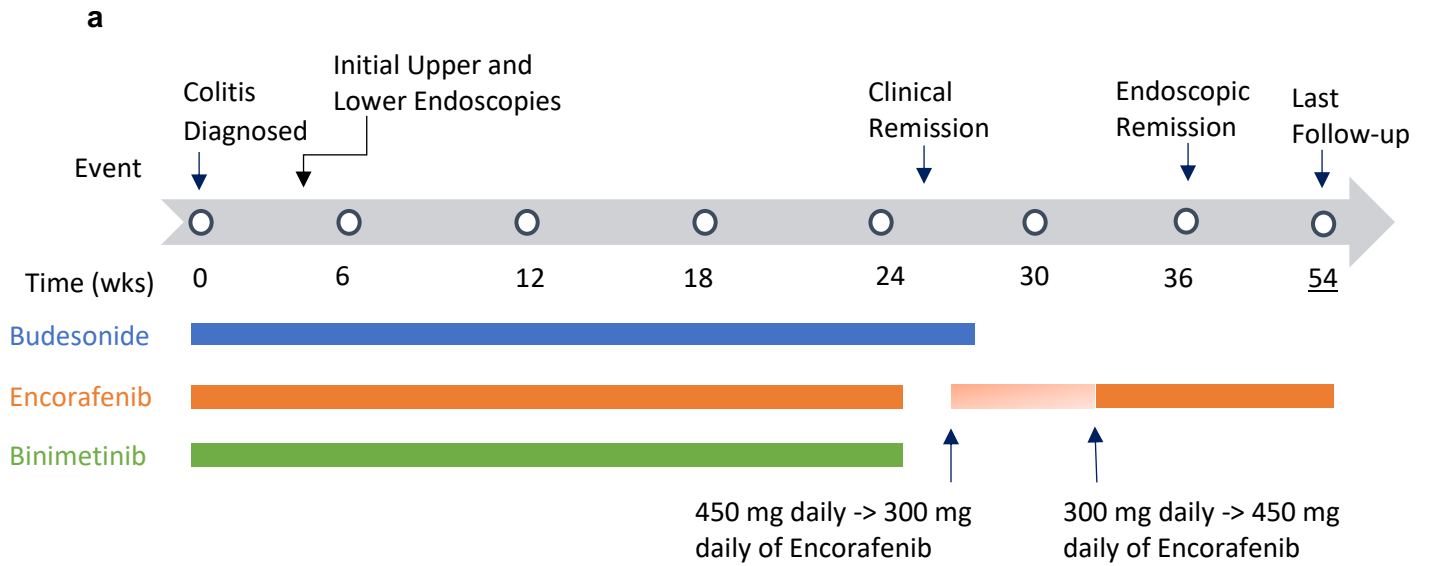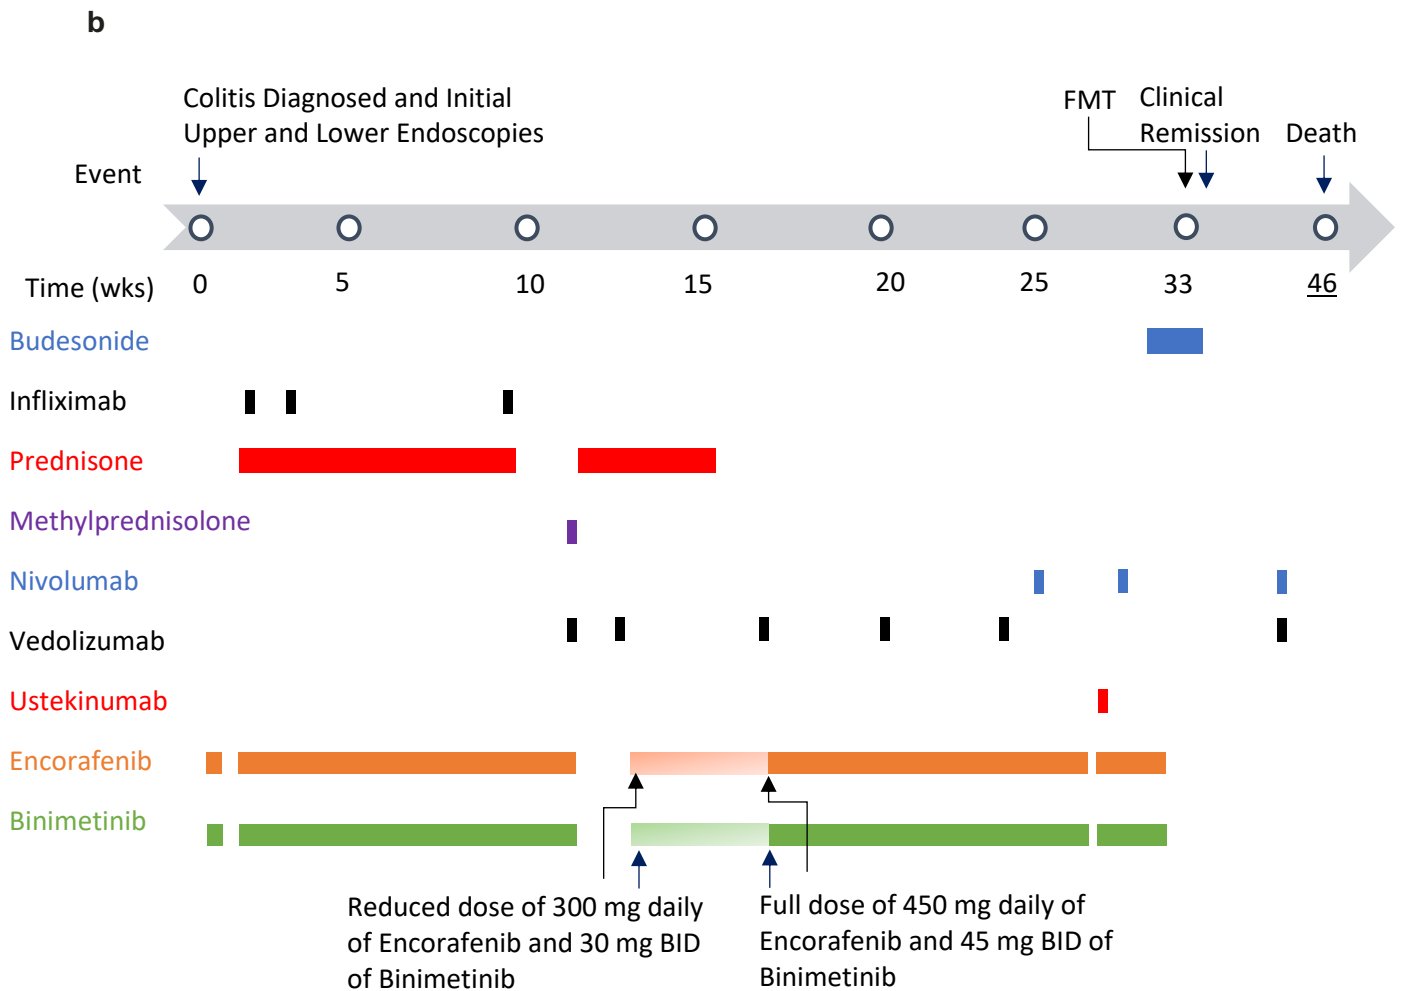

**c**

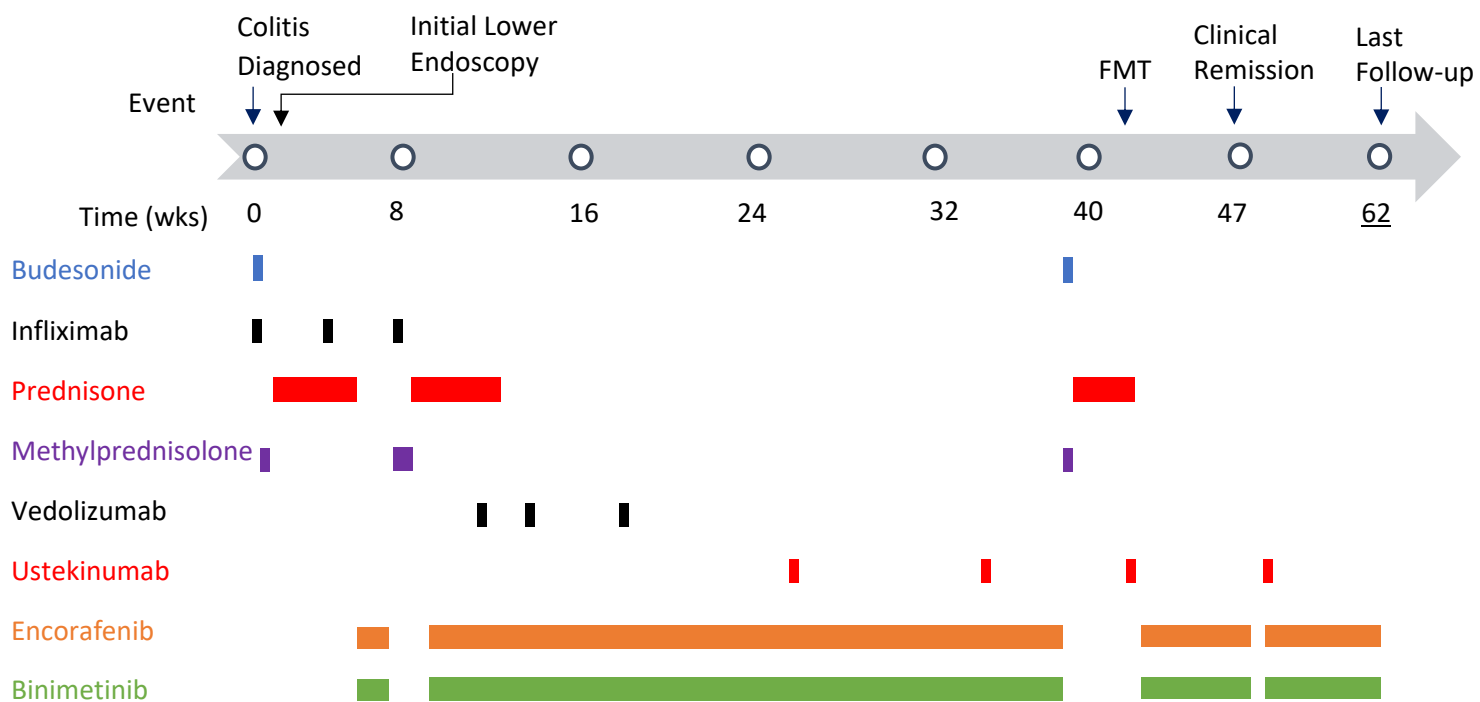

**d**

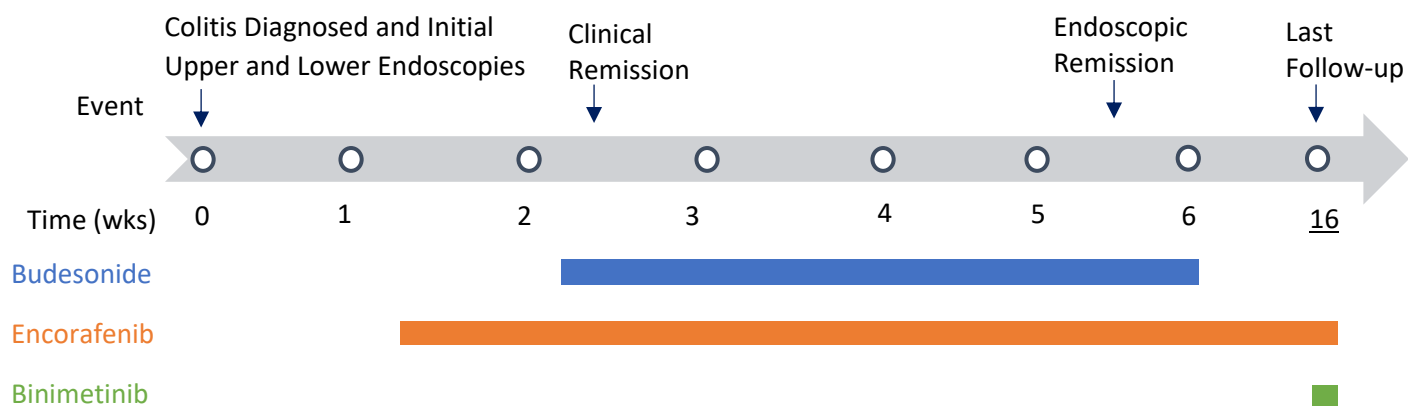

Supplement: crg-0016-0388-s02.pdf [file crg-0016-0388-s02.pdf]
